# Supplementary material for: Influence of the Nature of Aminoalcohol on ZnO Films Formed by Sol-Gel Methods
Source: MDPI journal article supplement (doi:10.3390/nano13061057), 2023-03-15
Supplement: s1 [file s1]

## Influence of the nature of the aminoalcohol on ZnO films formed by sol-gel methods

**Figures S1–S4:** Indexed XRD patterns, in the main angular range from 25 to 75 deg  $2\theta$ , of the ZnO films **1a–1d** obtained at 400, 500, and 600 °C.;

**Figure S5:** Indexed XRD patterns, in the main angular range from 25 to 75 deg  $2\theta$ , of the ZnO films **1e** obtained at 300, 400, 500, and 600 °C.;

**Figure S6:** Variation of the relative abundance of the sphalerite and wurtzite forms of ZnO present in films **1a–1e** obtained after the thermal treatment at  $T = 400, 500$  and  $600$  °C;

**Figures S7–S10:** Tauc's plots for films **1a–1c** and **1e** at each annealing temperature;

**Figures S11–S14:** Fittings to find the Urbach's energy of films **1a–1c** and **1e** at each annealing temperature;

**Figures S15–S18:** PL spectra of films **1a–1c** and **1e** annealed at 600 °C and Gaussian deconvolution of their DLE bands.

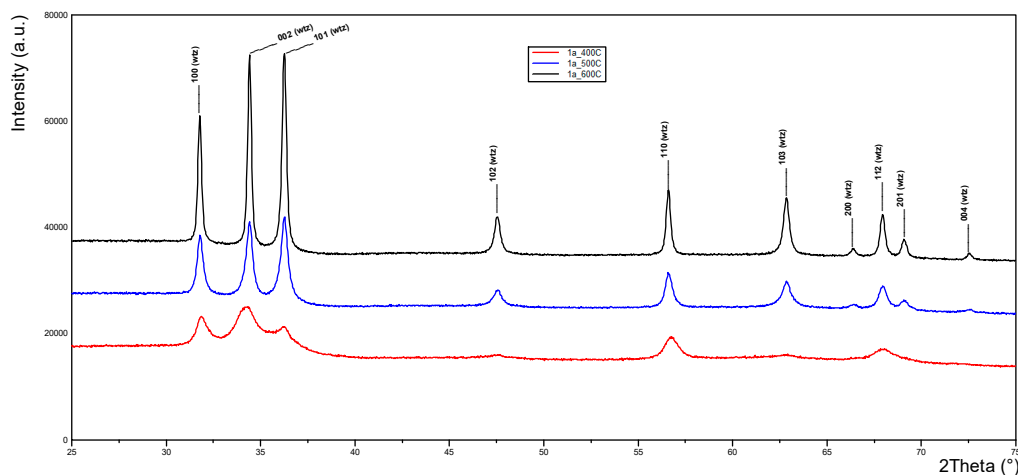

**Figure S1:** Indexed XRD patterns, in the main angular range from 25 to 75 deg  $2\theta$ , of the ZnO films **1a** obtained at 400, 500, and 600 °C.

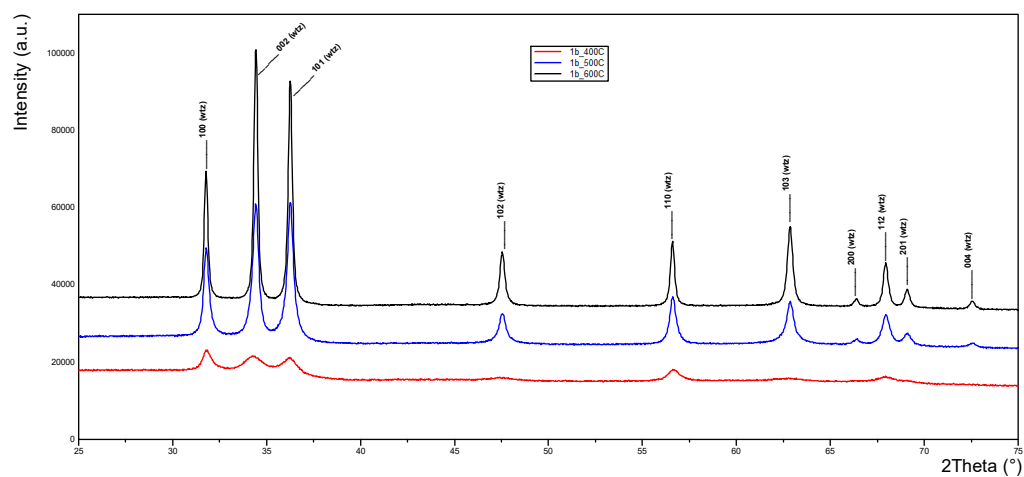

**Figure S2:** Indexed XRD patterns, in the main angular range from 25 to 75 deg 2θ, of the ZnO films **1b** obtained at 400, 500, and 600 °C.

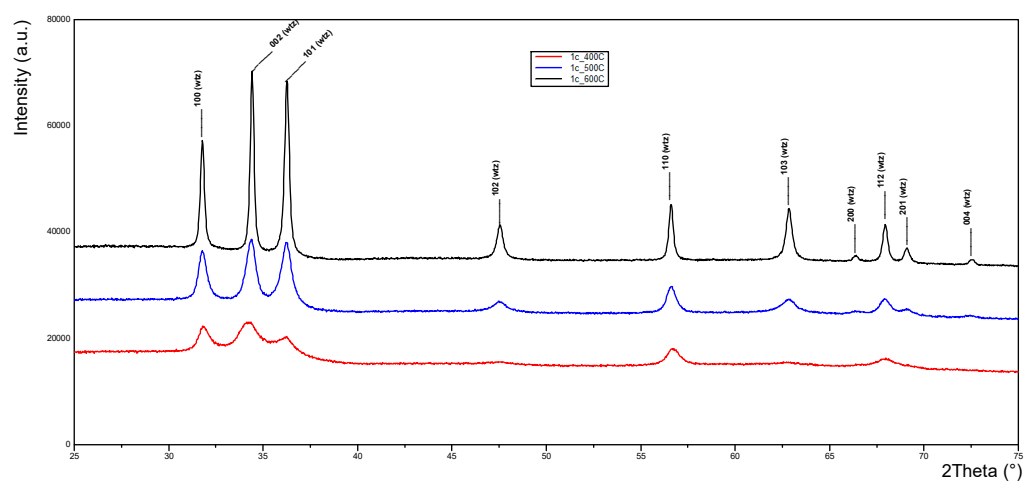

**Figure S3:** Indexed XRD patterns, in the main angular range from 25 to 75 deg 2θ, of the ZnO films **1c** obtained at 400, 500, and 600 °C.

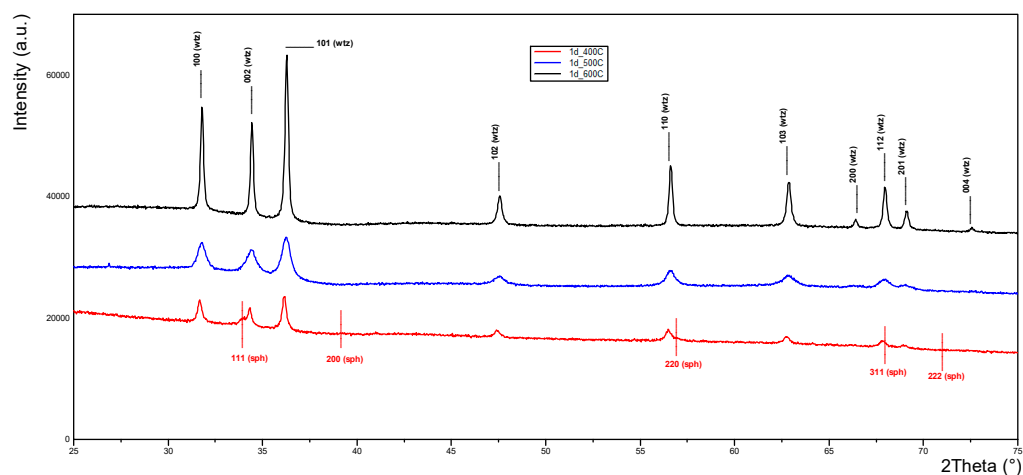

**Figure S4:** Indexed XRD patterns, in the main angular range from 25 to 75 deg  $2\theta$ , of the ZnO films **1d** obtained at 400, 500, and 600 °C.

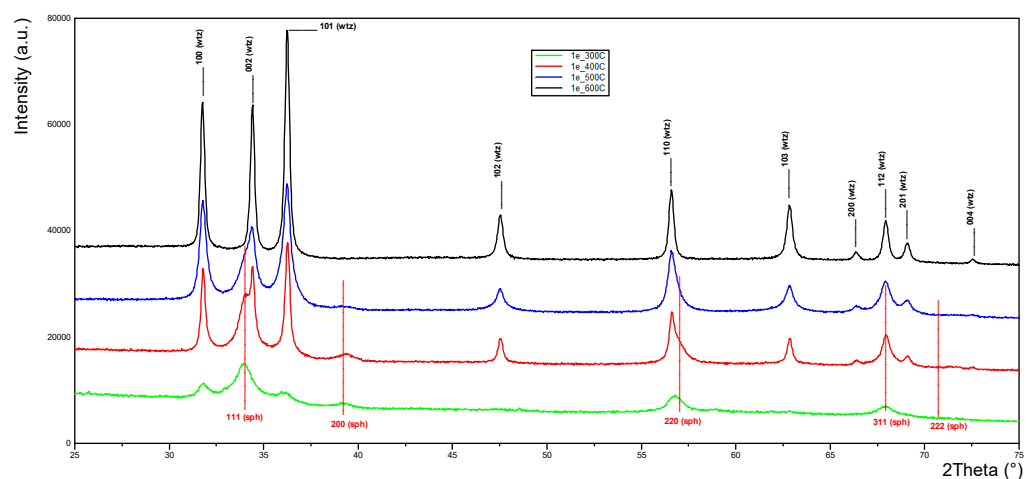

**Figure S5:** Indexed XRD patterns, in the main angular range from 25 to 75 deg  $2\theta$ , of the ZnO films **1e** obtained at 300, 400, 500, and 600 °C.

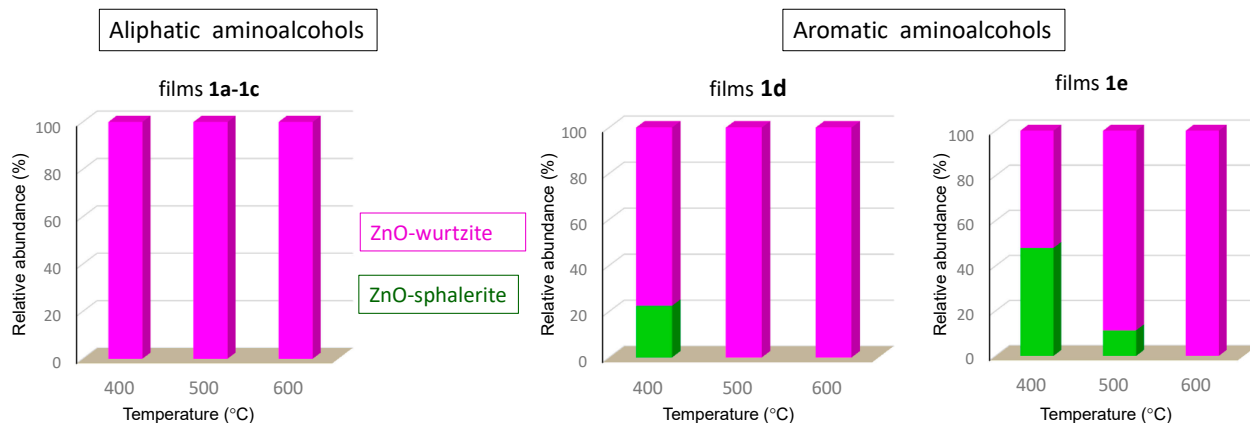

**Figure S6:** Variation of the relative abundance of the sphalerite and wurtzite forms of ZnO present in films **1a–1e** obtained after the thermal treatment at 400, 500 and 600 °C.

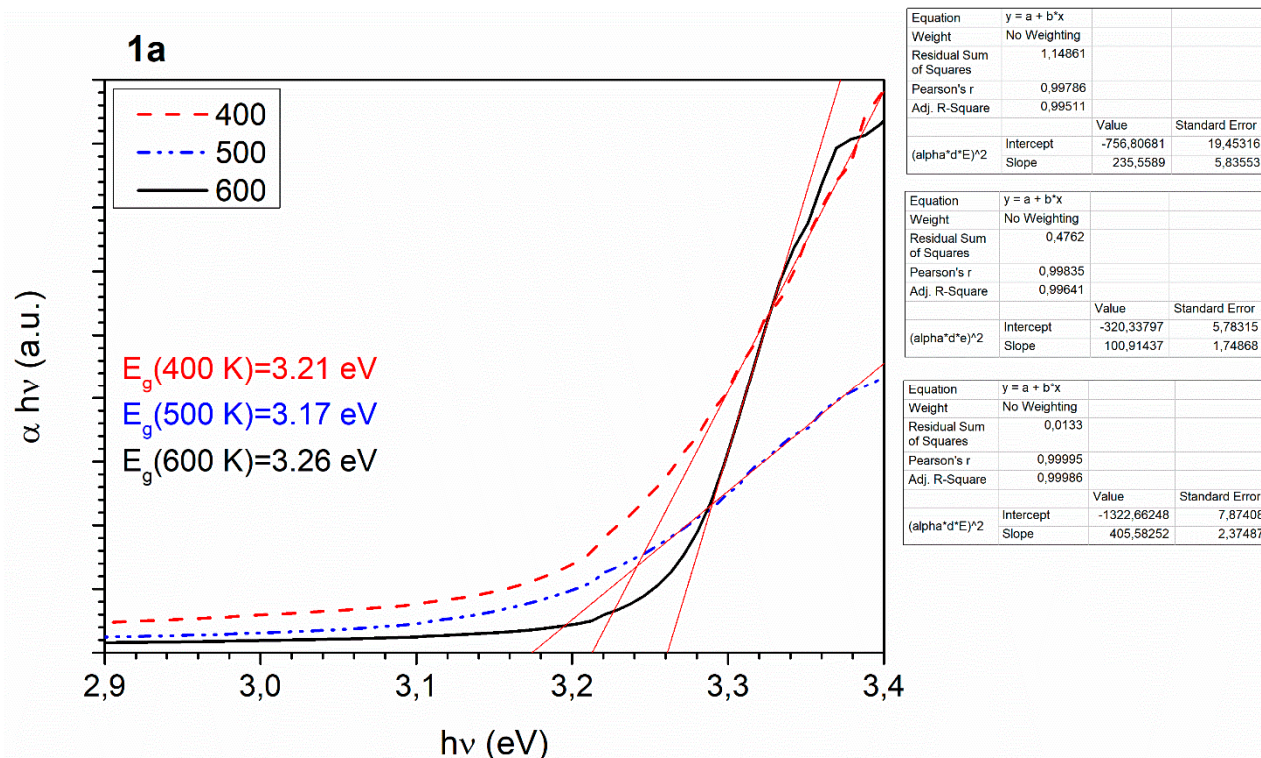

**Figure S7:** Tauc's plot for films **1a** at each annealing temperature.

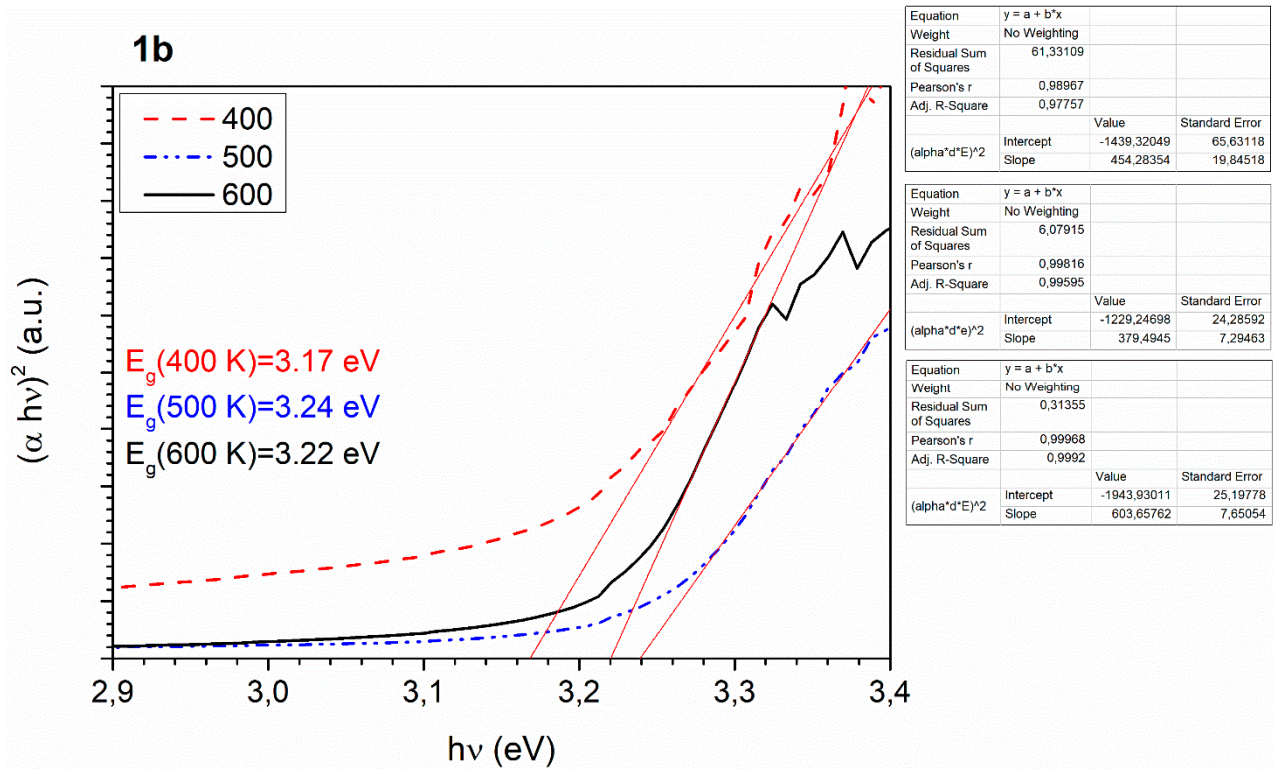

**Figure S8:** Tauc's plot for films **1b** at each annealing temperature.

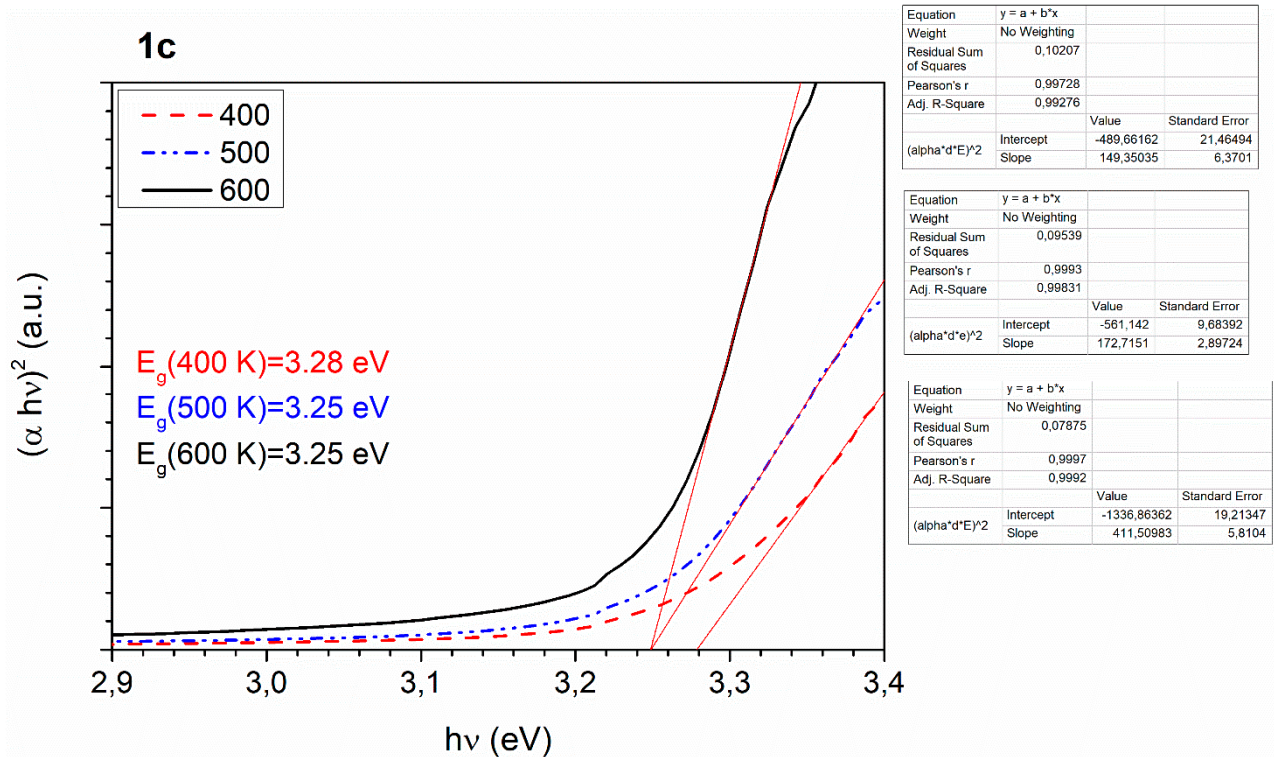

**Figure S9:** Tauc's plot for films **1c** at each annealing temperature.



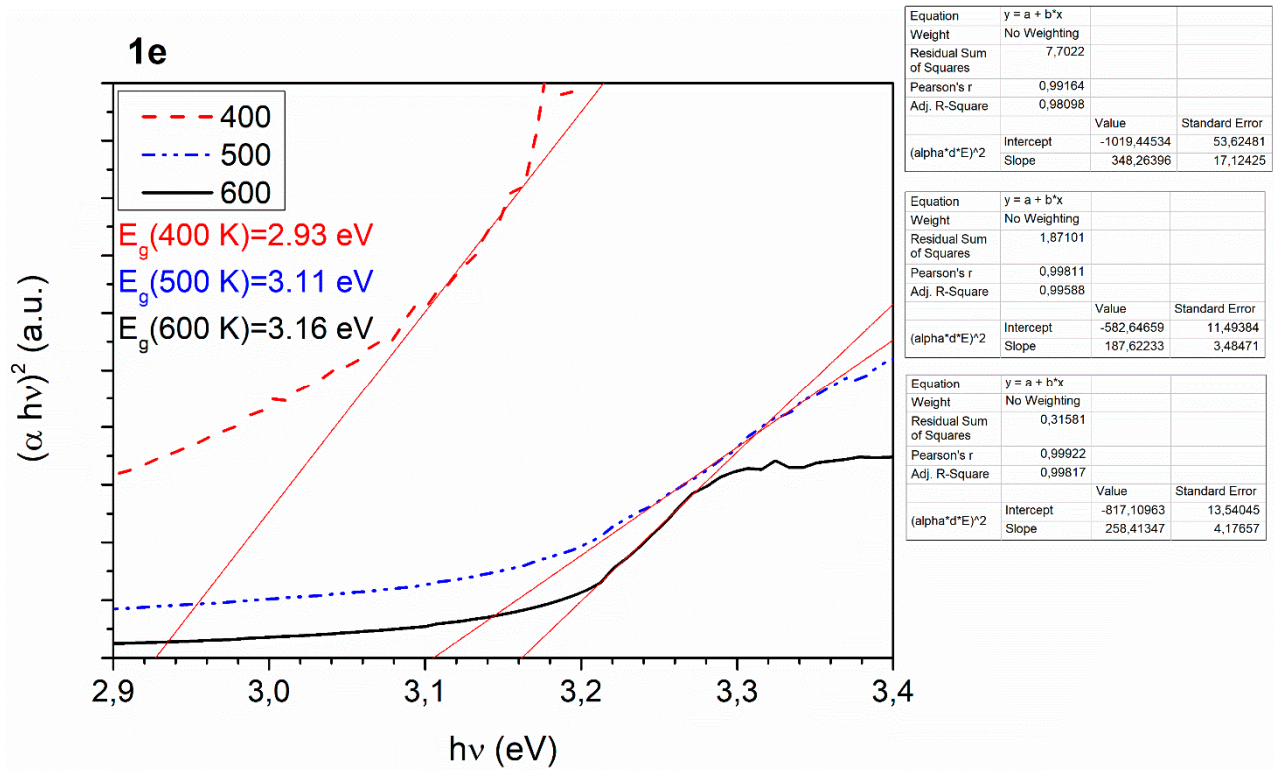

**Figure S10:** Tauc's plot for films **1e** at each annealing temperature.

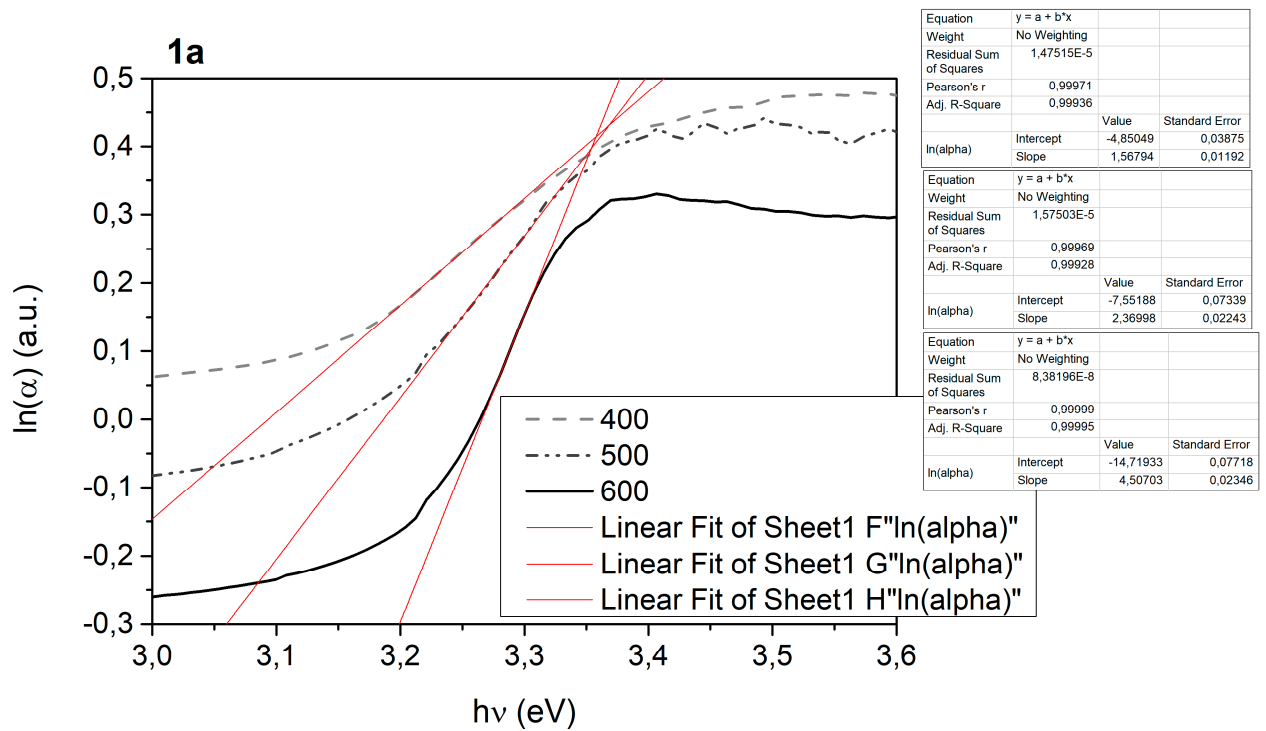

**Figure S11:** Fittings to find the Urbach's energy of films **1a** at each annealing temperature;

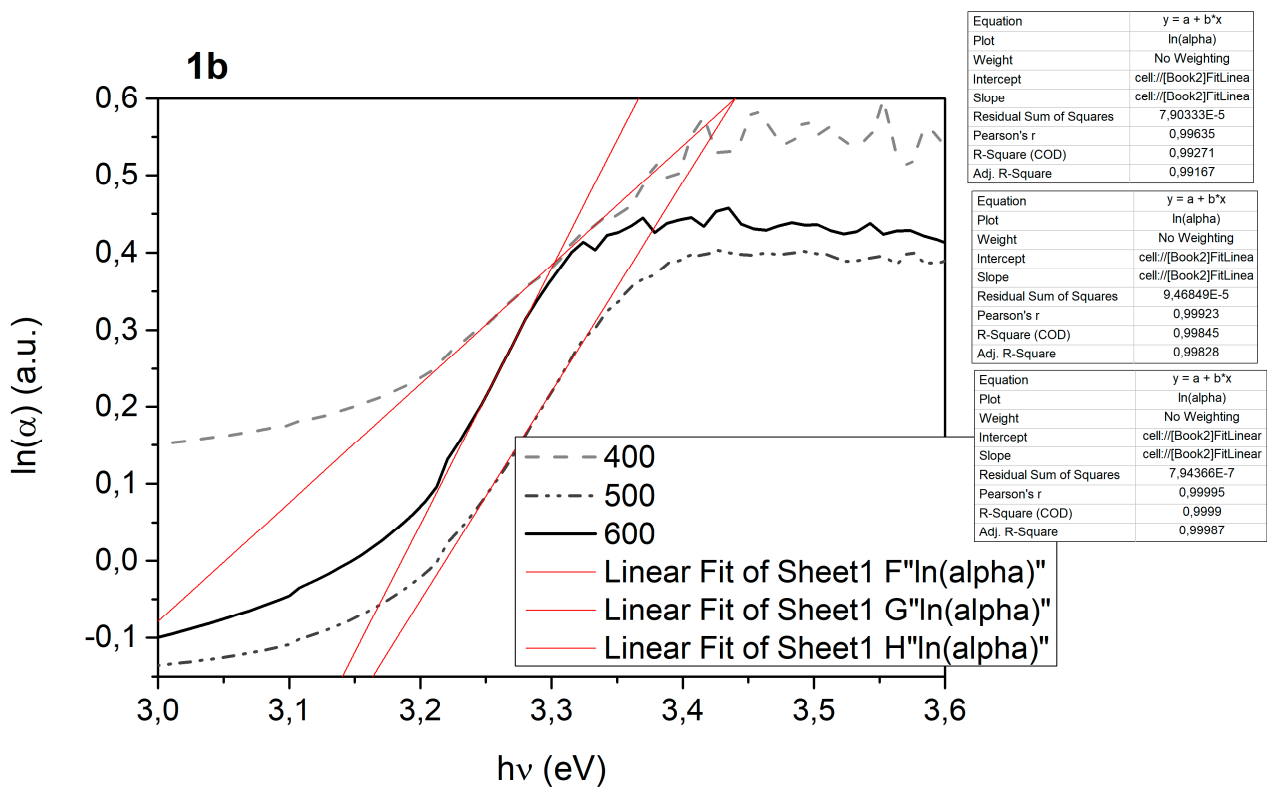

**Figure S12:** Fittings to find the Urbach's energy of films **1b** at each annealing temperature;

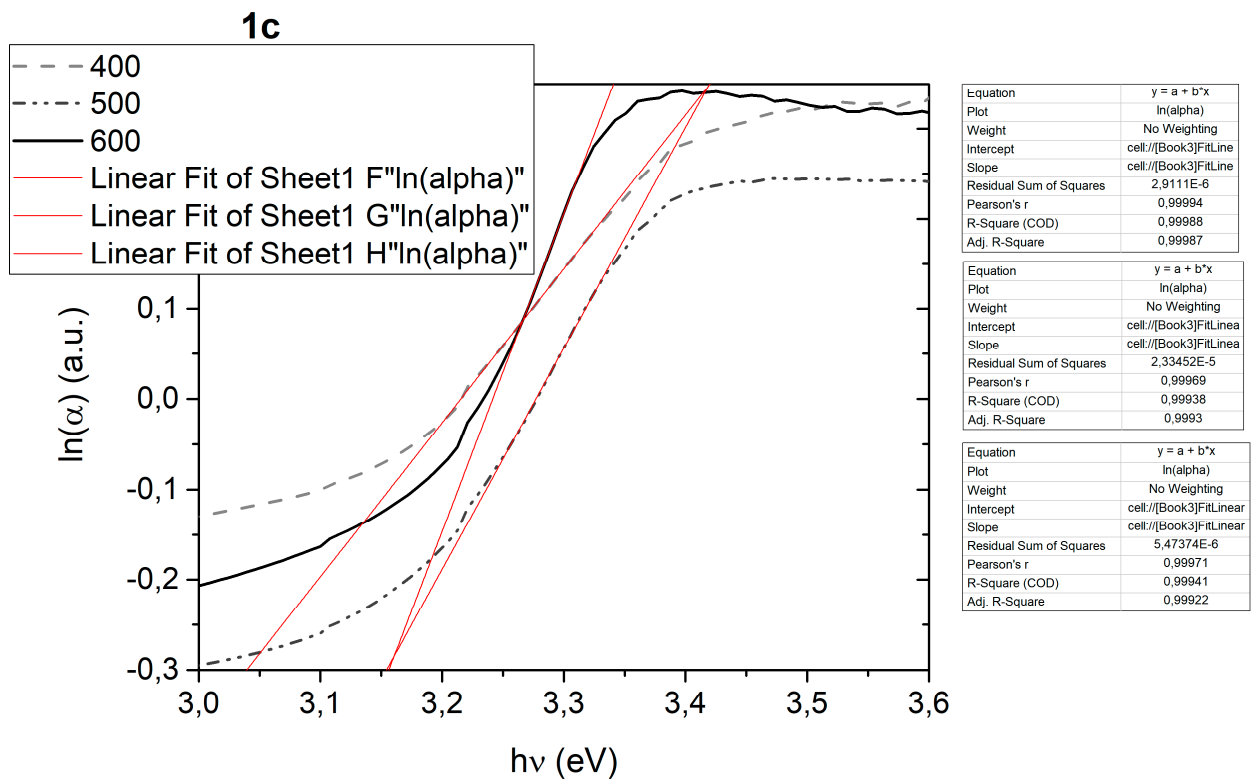

**Figure S13:** Fittings to find the Urbach's energy of films **1c** at each annealing temperature;

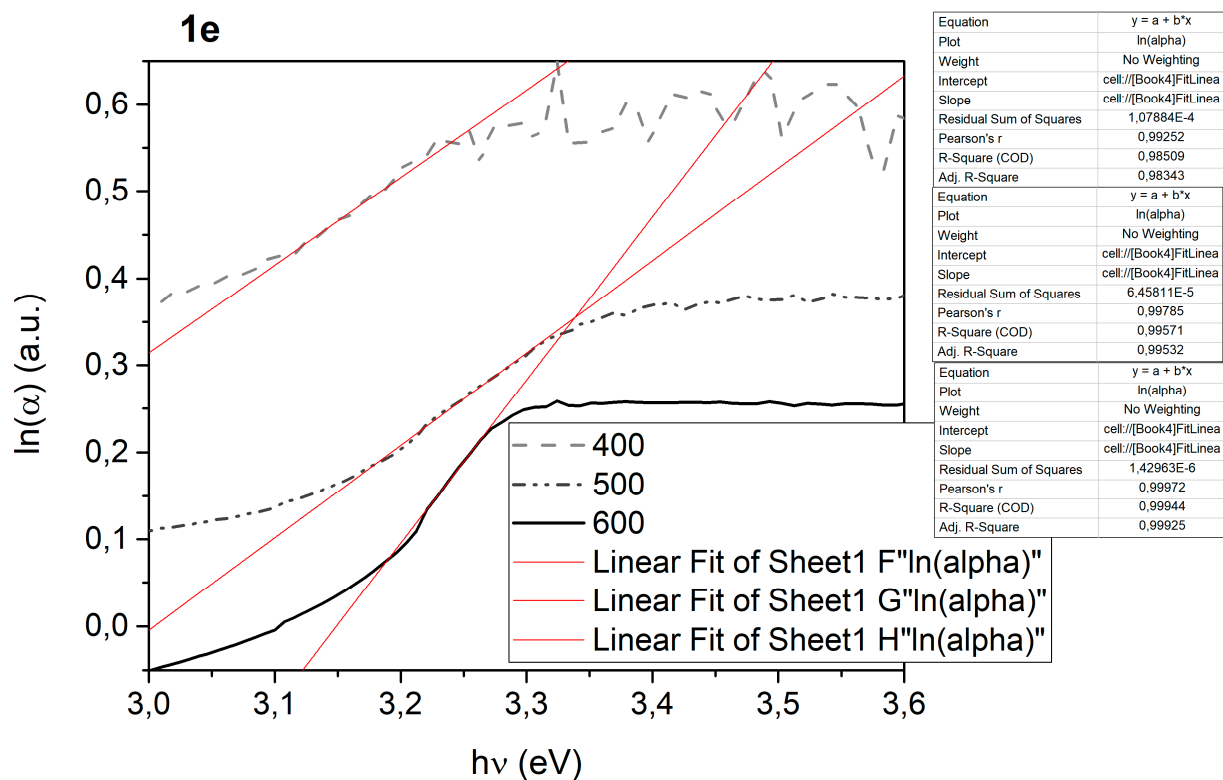

**Figure S14:** Fittings to find the Urbach's energy of films **1e** at each annealing temperature;

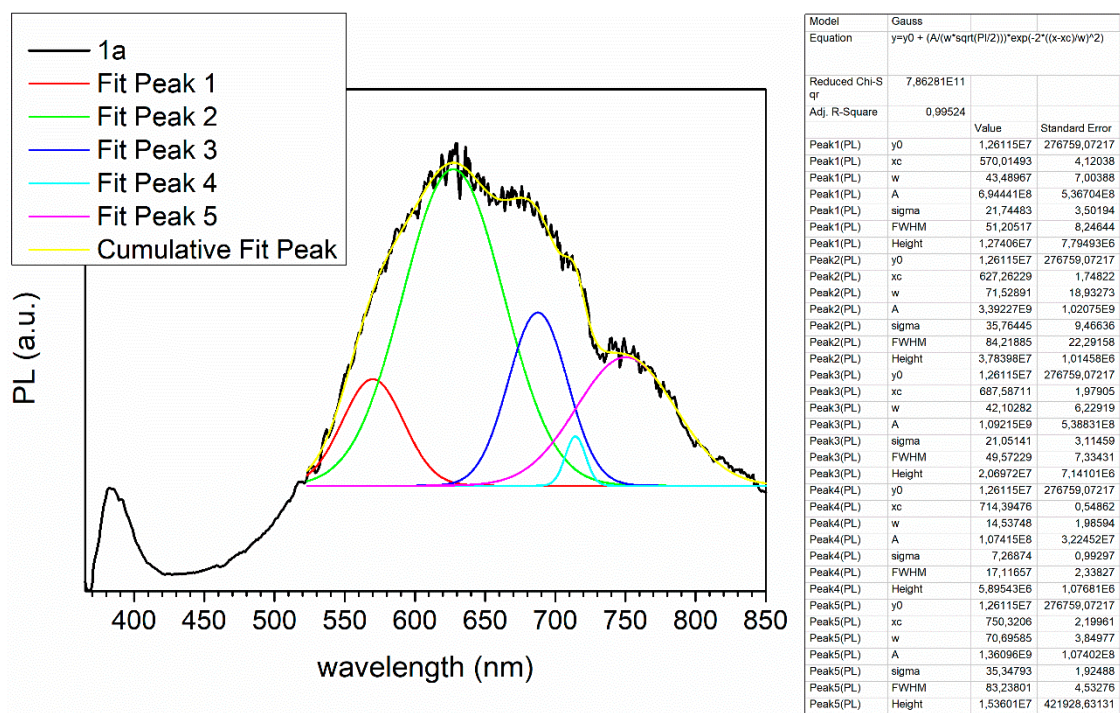

**Figure S15:** PL spectrum of film **1a** annealed at 600 °C and Gaussian deconvolution of its DLE bands.



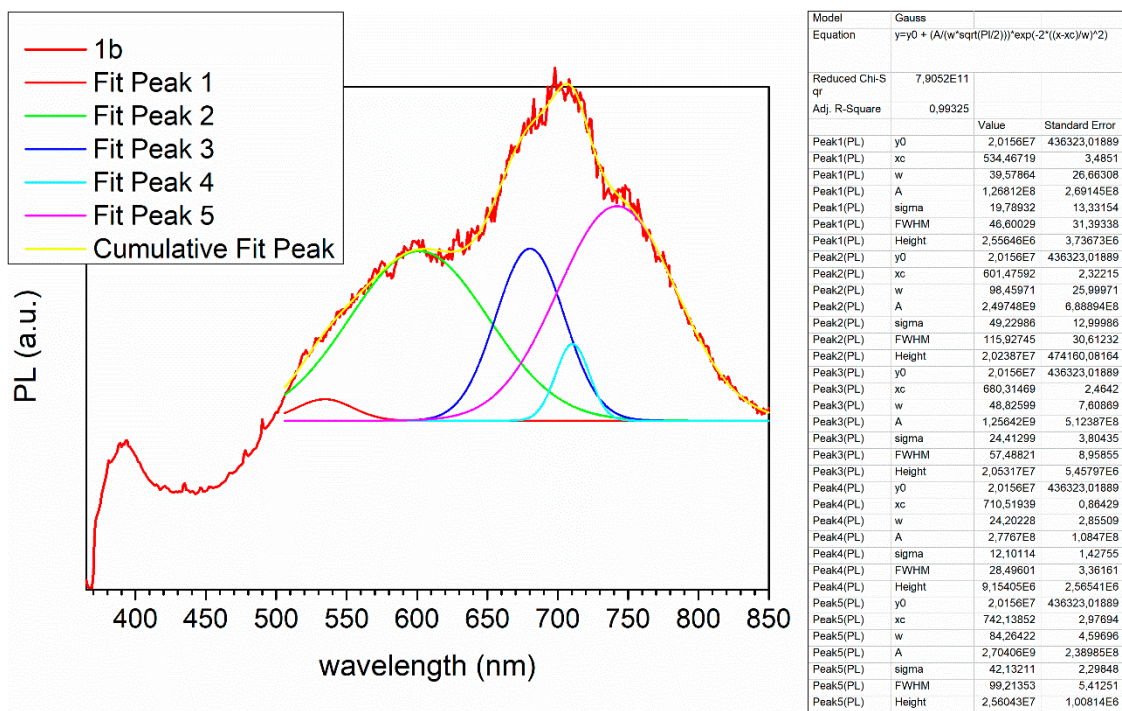

**Figure S16:** PL spectrum of film **1b** annealed at 600 °C and Gaussian deconvolution of its DLE bands.

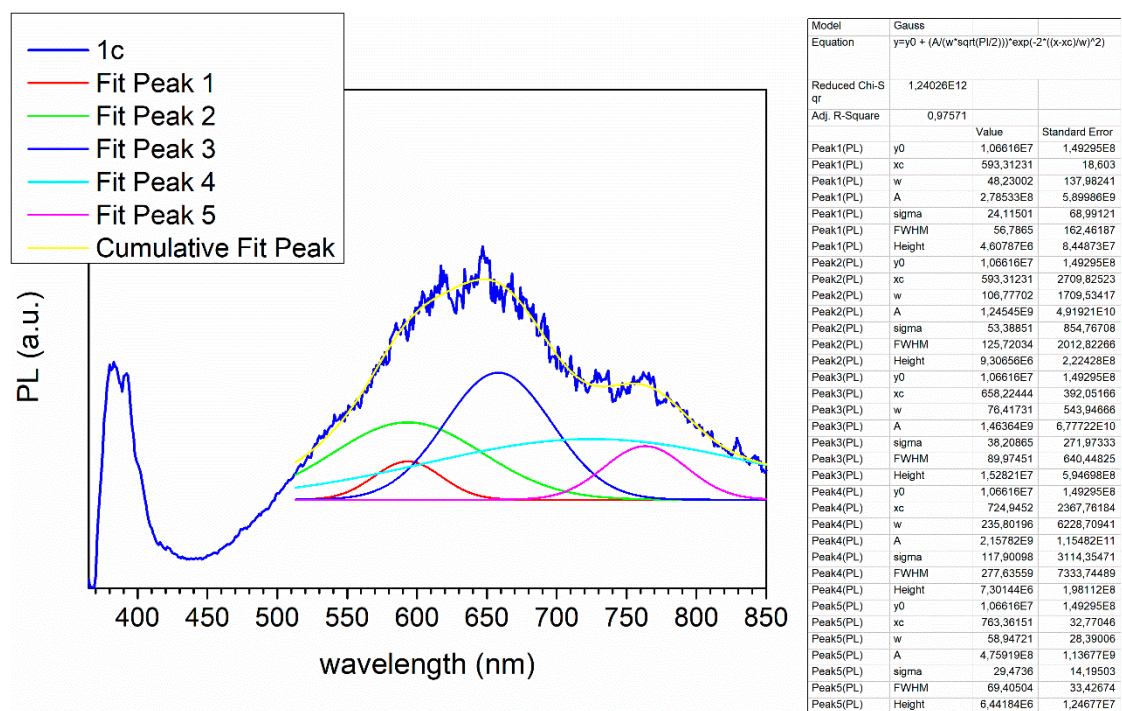

**Figure S17:** PL spectrum of film **1c** annealed at 600 °C and Gaussian deconvolution of its DLE bands.

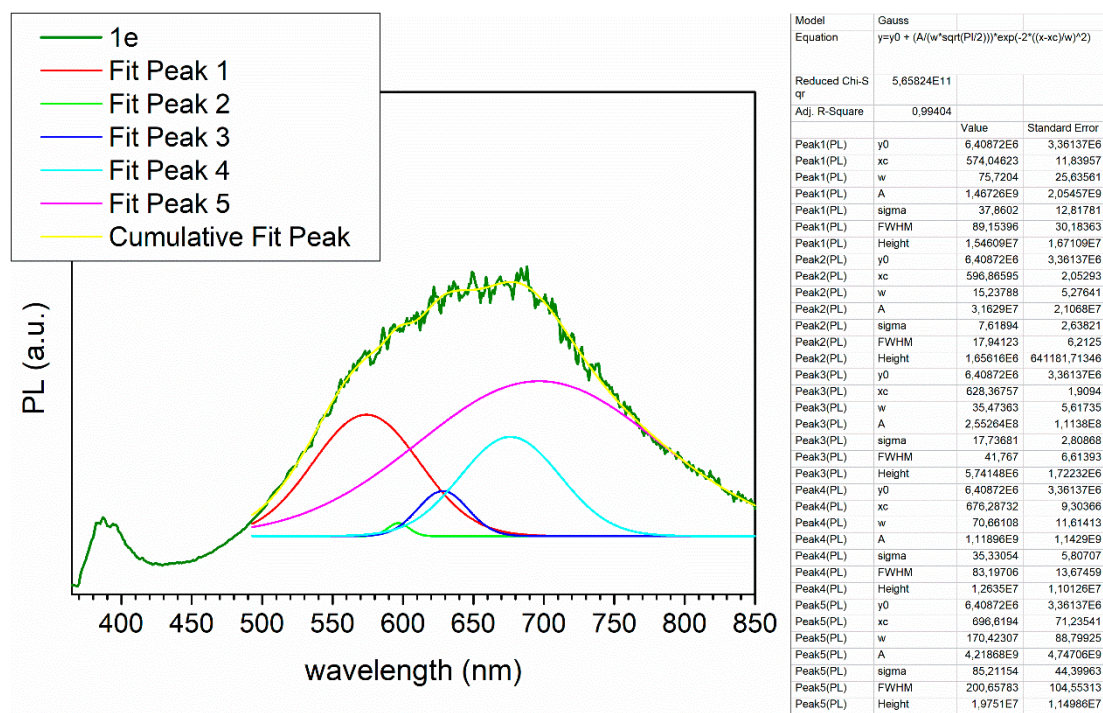

**Figure S18:** PL spectrum of film **1e** annealed at 600 °C and Gaussian deconvolution of its DLE bands.

**Table S1:** Wavelet position of each NBE component obtained after Gaussian deconvolution for **1a–1c** and **1e** films annealed at 600 °C.

| Aminoalcohol                       | Aliphatic |                  |           | Aromatic  |
|------------------------------------|-----------|------------------|-----------|-----------|
| Film                               | <b>1a</b> | <b>1b</b>        | <b>1c</b> | <b>1e</b> |
| Calculated maximum wavelength (nm) | 381       | 373 <sup>a</sup> | 380       | 384       |
|                                    | 391       | 392              | 391       | 395       |

<sup>a</sup> Rather insignificant in comparison to the other peak
